1 **Insight into the resistome and quorum sensing system of a divergent *Acinetobacter pittii* isolate from**  
2 **an untouched site of the Lechuguilla Cave**

3  
4 Han Ming Gan<sup>1,2,3\*</sup>, Peter Wengert<sup>4</sup>, Hazel A. Barton<sup>5</sup>, André O. Hudson<sup>4</sup> and Michael A. Savka<sup>4</sup>

5 <sup>1</sup> Centre for Integrative Ecology, School of Life and Environmental Sciences, Deakin University, Geelong  
6 3220, Victoria, Australia

7 <sup>2</sup> Deakin Genomics Centre, Deakin University, Geelong 3220, Victoria, Australia

8 <sup>3</sup> School of Science, Monash University Malaysia, Bandar Sunway, 47500 Petaling Jaya, Selangor,  
9 Malaysia

10 <sup>4</sup> Thomas H. Gosnell School of Life Sciences, Rochester Institute of Technology, Rochester, NY, USA

11 <sup>5</sup> Department of Biology, University of Akron, Akron, Ohio, USA

12 \*Corresponding author

13 Name: Han Ming Gan

14 Email: [han.gan@deakin.edu.au](mailto:han.gan@deakin.edu.au)

15 **Key words**

16 *Acinetobacter*, quorum sensing, antibiotic resistance

17  
18 **Abstract**

19 *Acinetobacter* are Gram-negative bacteria belonging to the sub-phyla Gammaproteobacteria, commonly  
20 associated with soils, animal feeds and water. Some members of the *Acinetobacter* have been  
21 implicated in hospital-acquired infections, with broad-spectrum antibiotic resistance. Here we report the  
22 whole genome sequence of LC510, an *Acinetobacter* species isolated from deep within a pristine  
23 location of the Lechuguilla Cave. Pairwise nucleotide comparison to three type strains within the genus  
24 *Acinetobacter* assigned LC510 as an *Acinetobacter pittii* isolate. Scanning of the LC510 genome  
25 identified two genes coding for  $\beta$ -lactamase resistance, despite the fact that LC510 was isolated from a  
26 portion of the cave not previously visited by humans and protected from anthropogenic input. The  
27 ability to produce acyl-homoserine lactone (AHL) signal in culture medium, an observation that is  
28 consistent with the identification of the *luxI* and *luxR* homologs in its genome, suggests that cell-to-cell  
29 communication remains important in an isolated cave ecosystem.

30

31

32 **Introduction**

33 The identification and functionality of antibiotic-resistant and quorum sensing genes from bacteria  
34 isolated from pristine environments (areas previously not visited by humans) have raised questions  
35 about their origins and natural functions in the environment (1, 2). For example, several bacterial strains  
36 isolated from an extremely isolated, hyper-oligotrophic underground ecosystem, Lechuguilla Cave, were  
37 shown to harbor antibiotic-resistant genes, including nine previously unrecognized mechanisms of  
38 antibiotic resistance (1). In 2014, a total of 93 LC strains (33% Gram-positive and 63% Gram-negative)  
39 were reported by Bhullar *et al* and were phylogenetically classified based on sequencing of the 16S rRNA  
40 gene (3). In recent years, the taxonomic assignment of some LC strains has been revised mostly at the  
41 species level following whole-genome sequencing and genome-based phylogeny (4, 5). In addition, new  
42 *luxI* homologs have also been identified in the sequenced strains following genome annotation (4, 5).

43 Of the 93 LC strains reported, LC510 stood out due to its initial species designation as  
44 *Acinetobacter calcoaceticus* that is associated with nosocomial infections. LC510 was isolated from a site  
45 deep within the Capitan Formation proximal to the region named “Deep Secrets” at a depth below the  
46 surface of approximately 400 m (3). Although most members of *Acinetobacter* are found in soils, waters  
47 and occasionally animal feeds, some *Acinetobacter* species are known to infect humans with broad-  
48 spectrum antibiotic resistance and such environmental isolates may serve as a reservoir for additional  
49 resistance determinants (6, 7). In this study, we characterized LC510 using whole-genome sequencing,  
50 biochemical assays, and bioinformatic tools, providing insights into its taxonomic affiliation, resistome  
51 and quorum sensing potential.

52

### 53 **Materials and Methods:**

#### 54 **DNA extraction and whole-genome sequencing**

55 The isolation, antibiotic characterization and 16S rRNA gene-based identification of strain LC510 have  
56 been described previously (3). For gDNA extraction, a single plate colony of LC510 was inoculated into  
57 50 mL of sterile ½ strength tryptic soy broth (TSB) and grown overnight at 30°C with shaking at 150 rpm.  
58 The overnight culture was pelleted by centrifugation at 10,000 × g for 10 minutes. Genomic DNA (gDNA)  
59 extraction was performed on the pelleted cells using the QIAam DNA Mini kit (Qiagen, Germany)  
60 according to the manufacturer’s instructions. The purified gDNA was quantified using the Qubit BR Assay  
61 (Invitrogen, Santa Clara, CA, USA) and normalized to 0.2 ng/μL for Nextera XT library preparation  
62 (Illumina, San Diego, CA, USA). The constructed library was sequenced on an Illumina MiSeq (2 x 151 bp  
63 run configuration) located at the Monash University Malaysia Genomics Facility that routinely sequences  
64 metazoan mitogenomes (8-10) and occasionally viral and microbial genomes (11, 12) with no prior

65 history of processing any member from the genus *Acinetobacter*, or more broadly the family  
66 Moraxellaceae.

67

### 68 ***De novo* assembly and genome-based species classification**

69 Raw paired-end reads were adapter-trimmed using Trimmomatic v0.36 (13) followed by *de novo*  
70 assembly using Unicycler v0.4.7 (default setting with minimum contig length set to 500 bp) (14). We  
71 then used Jspecies v1.2.1 (15) to calculate the pairwise average nucleotide identity (ANI) of LC510  
72 against the type strain genomes of *Acinetobacter pittii* (WGS Project: [BBST01](#)), *Acinetobacter lactucae*  
73 (WGS Project: [LRPE01](#)) and *Acinetobacter calcoaceticus* (WGS Project: [AIEC01](#)).

74

### 75 **Genome annotation and detection of antibiotic resistance genes**

76 Genome annotation used Prokka v1.13 (16) and the predicted protein-coding genes were used as the  
77 input for Abricate v0.8.7 (<https://github.com/tseemann/abricate>) to search for antibiotic resistance  
78 genes against the ResFinder database (minimum query length coverage and nucleotide identity of 90%)  
79 (17). The alignment of *bla*<sub>OXA</sub> proteins used MUSCLE followed by maximum likelihood tree construction  
80 with FastTree2 (1000 (18)).

81

### 82 **Acyl-homoserine lactone bioassay**

83 A single ½ strength tryptic soy agar plate colony of LC510 was inoculated into 50 mL of sterile ½ strength  
84 tryptic soy broth and grown overnight at 30°C with shaking at 150 rpm. An equal volume of ethyl acetate  
85 (EtOAc) was added to the culture followed by shaking at 50 rpm on an orbital shaker for one hour. The  
86 EtOAc layer (upper layer) containing the extracted AHL was evaporated to dryness with a vacuum  
87 concentrated and resuspended in fresh EtOAc to make a 20× concentrated extract. Then, 25 µl of the  
88 extract was spotted (2 µl/transfer) onto a reverse-phase thin layer chromatography silica gel 60 RP-18  
89 sheet (Merck, Kenilworth, NJ, USA). In addition to the LC510 AHL extract, six synthetic AHL standards  
90 were also spotted in separate lanes for comparison. The chromatography was carried-out with a  
91 70%:30% methanol:water mobile phase. The TLC was subsequently dried and overlaid with 1X AB agar  
92 medium containing TraR-dependent *lacZ* *Agrobacterium tumefaciens* reporter strain and X-gal as  
93 previously described (19). After an overnight incubation at 30°C, visualization and identification of the  
94 AHL separated on the TLC were carried out.

95

### 96 ***In-silico* analysis of the homoserine lactone synthase gene**

97 Proteins were scanned using HMMsearch v3.1b1 with an E-value cutoff of 1E-5 for the presence of Pfam  
98 profile PF00765 ([https://pfam.xfam.org/family/Autoind\\_synth](https://pfam.xfam.org/family/Autoind_synth)) that contains the probabilistic model  
99 used for the statistical inference of LuxI-type family of autoinducer synthases (20, 21). The gene  
100 organization of contigs containing the *luxI* and *luxR* homolog was visualized using Easyfig (BLASTn  
101 setting) (22).

102

## 103 **Results and Discussion**

104

### 105 **Genome statistics and taxonomic assignment**

106 The assembled LC510 genome was contained in 115 contigs ( $N_{50}$  length of 66.9 kb) with a total length  
107 and GC content of 3,767,126 bp and 38.63%, respectively. Based on 16S rRNA gene identification, strain  
108 LC510 was previously assigned to the species *Acinetobacter calcoaceticus* (See Table S2 in (3)). However,  
109 it only exhibited a pairwise ANI of 90% to *Acinetobacter calcoaceticus* DSM30006<sup>T</sup>, a value that is far  
110 below the established threshold required for species assignment (15). Expanding the ANI calculation to  
111 other closely related species of *A. calcoaceticus* showed that strain LC510 should instead be assigned to  
112 the species *A. pittii*, given its >95% pairwise ANI to *A. pittii* DSM25618<sup>T</sup> and *A. pittii* PHEA-2 (Figure 1).

113

### 114 **Identification of *beta*-lactamase-producing genes**

115 LC510 was previously shown to exhibit resistance against ampicillin and cephalexin (See Figure 3 in (3)).  
116 Scanning of its genome identified two genes coding for beta-lactamases namely *bla*<sub>OXA-213</sub>-like (locus tag:  
117 YA64\_005895) and *bla*<sub>ADC</sub> (locus tag: YA64\_000855). The *bla*<sub>OXA-213</sub>-like gene is commonly found among  
118 members of *Acinetobacter calcoaceticus* and *Acinetobacter pittii* (Figure 2) with demonstrated  
119 resistance to ampicillin through heterologous expression in *Escherichia coli* host (23). A conserved  
120 penicillin-binding domain was identified in the *bla*<sub>OXA-213</sub>-like protein of LC510 which provides additional  
121 support to its role in conferring resistance to ampicillin. The resistance of LC510 to cephalexin is likely  
122 explained by the presence and expression of a *bla*<sub>ADC</sub> gene encoding for AmpC beta-lactamase (24).

123 Cloning and regulated expression of these two *bla* genes will be instructive to verify their *in-silico*  
124 predicted role in hydrolyzing beta-lactam drugs (24). The presence of *bla*<sub>ADC</sub> and *bla*<sub>OXA-213</sub>-like genes in  
125 cave isolate LC510 that has no prior history of anthropogenic exposure supports previous work claiming  
126 that these genes contribute to the intrinsic antibiotic resistance in *A. pittii* (6, 23). The intrinsic  
127 ampicillin resistance of *A. pittii* can be suppressed with sulbactam, a *beta*-lactamase inhibitor (25),

128 making ampicillin-sulbactam an effective antibiotic for the treatment of carbapenem-resistant *A. pittii*  
129 (7, 26).

130

### 131 **Detection of quorum-sensing signal molecules and identification of an autoinducer synthase gene in** 132 ***Acinetobacter pittii* LC510**

133 Given the demonstrated ability of several *Acinetobacter* strains to produce quorum-sensing signals that  
134 are implicated in the regulation of virulence factors and cell motility, we used both *in silico* and *in vivo*  
135 approaches to assess the presence of a quorum-sensing system in strain LC510. Under the described  
136 culturing condition, LC510 strain appears to produce a medium-length AHL signal that exhibits a  
137 migration rate between C6-OH and C8-OH (Figure 3). The *luxI* and *luxR* homologs in LC510 were localized  
138 on contigs 41 and 18, respectively that exhibit strikingly high synteny to the *luxI/luxR* gene cluster in *A.*  
139 *pittii* PHEA-2 (Figure 4). Such a gene organization was similarly found in *Acinetobacter baumannii* M2  
140 (27), hinting the conservation of this gene cluster and its quorum sensing (QS)-regulated genes among  
141 members of *Acinetobacter*. Transposon disruption of the *luxI* homolog (*abal*) in strain M2 led to a  
142 substantial reduction in motility that could be rescued with the supplementation of its cognate AHL  
143 signal in the media (27). The presence of this gene cluster in LC510 may suggest that the role of quorum  
144 sensing in regulating the motility of LC510 in its cave environment. The construction of *luxI* mutant for  
145 LC510, using either transposon mutagenesis or homologous recombination (28, 29), followed by  
146 transcriptome sequencing (30) will be extremely useful not only for validating the role of QS in cell  
147 motility but also in discovering other genes and phenotypes that may be regulated by QS.

148

### 149 **Conclusions**

150 The whole-genome sequence of a Lechuguilla Cave isolate (LC510) belonging to the species  
151 *Acinetobacter pittii* was presented in this study. The identification of two *bla* genes in the annotated  
152 genome of isolate LC510 that has no prior history of anthropogenic exposure supports previous work  
153 claiming that these genes contribute to the intrinsic antibiotic resistance in members of the species *A.*  
154 *pittii*. In addition, LC510 still retains the ability to engage in cell-to-cell communication in an isolated  
155 cave ecosystem as evidenced by the presence of a *luxI* homolog in its genome and its ability to  
156 accumulate of N-acyl-homoserine lactones in culture medium.

157

### 158 **Data Availability**

159 This Whole Genome Shotgun project has been deposited at DDBJ/ENA/GenBank under the accession  
160 LBHY00000000. The version described in this paper is [LBHY02000000](https://doi.org/10.1101/745182). Raw paired-end sequencing reads  
161 and sample metadata have been deposited into the NCBI public database under the BioProject ID  
162 PRJNA281683 (<https://www.ncbi.nlm.nih.gov/bioproject/PRJNA281683/>).

163

#### 164 **Acknowledgments**

165 PD, TP, AOH, and MAS acknowledge the College of Science and the Thomas H. Gosnell School of Life  
166 Sciences for support.

167

#### 168 **Conflicts of interest**

169 The authors declare that there are no conflicts of interest

170

#### 171 **Figure Legends**

172

173 **Figure 1.** Heatmap showing the clustering of *Acinetobacter* isolates based on their pairwise average  
174 nucleotide identity as indicated by the numerical values in the boxes.

175

176 **Figure 2.** Maximum likelihood tree depicting the evolutionary relationships of *bla* proteins found in  
177 *Acinetobacter* species. Boxed clades indicate the OXA-231-like proteins from *Acinetobacter pittii* and the  
178 tree were rooted with OXA-143-like and OXA-235-like proteins as the outgroup (31). Tip labels were  
179 formatted as “GenBank Accession Number”~ “OXA variant” \_ “[strain species and ID]”. Branch lengths  
180 indicate the number of substitutions per site.

181

182 **Figure 3.** Thin Layer Chromatography of AHL signal extract of LC510 and known AHL standards separated  
183 using 70:30 Methanol:Water and overlaid with *Agrobacterium tumefaciens* biosensor in the presence of  
184  $\beta$ -galactosidase substrate, X-Gal (19). Lanes 1 to 3 consist of known AHL standards while Lane 4 consists  
185 of 25  $\mu$ l of 20  $\times$  ethyl acetate culture extract equivalent to 400 mL of the overnight LC510 culture. C6, N-  
186 Hexanoyl-L-homoserine lactone; C8, N-octanoyl-L-Homoserine lactone; C6-oxo, N- $\beta$ -oxo-Hexanoyl-L-  
187 homoserine lactone; C8-oxo, N- $\beta$ -oxo-octanoyl-L-Homoserine lactone; C6-OH, N-(3-hydroxy-hexanoyl)-L-  
188 homoserine lactone; C8, N-(3-hydroxy-octanoyl)-L-Homoserine lactone.

189

190 **Figure 4.** Linear genome comparison of the LC510 contigs containing the *luxR* and *luxI* homologs with  
191 closely related *Acinetobacter pittii* PHEA-2 strain. The directions of the arrows indicate transcription  
192 orientation. Note: LC510 contigs 41 and 18 contain *luxI* and *luxR* homolog, respectively.

193

## 194 **References**

- 195 1. Pawlowski AC, Wang W, Koteva K, Barton HA, McArthur AG, Wright GD. A diverse intrinsic  
196 antibiotic resistome from a cave bacterium. *Nature communications*. 2016;7:13803.
- 197 2. Peterson E, Kaur P. Antibiotic Resistance Mechanisms in Bacteria: Relationships Between  
198 Resistance Determinants of Antibiotic Producers, Environmental Bacteria, and Clinical Pathogens.  
199 *Frontiers in Microbiology*. 2018;9(2928).
- 200 3. Bhullar K, Waglechner N, Pawlowski A, Koteva K, Banks ED, Johnston MD, et al. Antibiotic  
201 Resistance Is Prevalent in an Isolated Cave Microbiome. *PLOS ONE*. 2012;7(4):e34953.
- 202 4. Gan HM, Wengert PC, Barton HA, Hudson AO, Savka MA. Draft Genome Sequences of Five  
203 *Proteobacteria* Isolated from Lechuguilla Cave, New Mexico, USA, and Insights into Taxonomy and  
204 Quorum Sensing. *Microbiology Resource Announcements*. 2019;8(40):e00913-19.
- 205 5. Gan HY, Gan HM, Tarasco AM, Busairi NI, Barton HA, Hudson AO, et al. Whole-Genome  
206 Sequences of Five Oligotrophic Bacteria Isolated from Deep within Lechuguilla Cave, New Mexico.  
207 *Genome announcements*. 2014;2(6):e01133-14.
- 208 6. Cho G-S, Li B, Rostalsky A, Fiedler G, Rösch N, Igbinosa E, et al. Diversity and Antibiotic  
209 Susceptibility of *Acinetobacter* Strains From Milk Powder Produced in Germany. *Frontiers in*  
210 *microbiology*. 2018;9:536-.
- 211 7. Gonzalez C, Garcia A, Urrea R, del Solar E, Bello H, Zemelman R. A combination of ampicillin and  
212 sulbactam: effect on aerobic and anaerobic gram-negative bacteria. *Revista medica de Chile*.  
213 1990;118(5):548-54.
- 214 8. Grandjean F, Tan MH, Gan HM, Lee YP, Kawai T, Distefano RJ, et al. Rapid recovery of nuclear  
215 and mitochondrial genes by genome skimming from Northern Hemisphere freshwater crayfish.  
216 *Zoologica Scripta*. 2017;46(6):718-28.
- 217 9. Tan MH, Gan HM, Schultz MB, Austin CM. MitoPhAST, a new automated mitogenomic  
218 phylogeny tool in the post-genomic era with a case study of 89 decapod mitogenomes including eight  
219 new freshwater crayfish mitogenomes. *Molecular Phylogenetics and Evolution*. 2015;85:180-8.
- 220 10. Martins RF, Fickel J, Le M, van Nguyen T, Nguyen HM, Timmins R, et al. Phylogeography of red  
221 muntjacs reveals three distinct mitochondrial lineages. *BMC Evolutionary Biology*. 2017;17(1):34.
- 222 11. Dhanoa A, Hassan SS, Ngim CF, Lau CF, Chan TS, Adnan NAA, et al. Impact of dengue virus  
223 (DENV) co-infection on clinical manifestations, disease severity and laboratory parameters. *BMC*  
224 *infectious diseases*. 2016;16(1):406.
- 225 12. Gan HY, Gan HM, Savka MA, Triassi AJ, Wheatley MS, Smart LB, et al. Whole-genome sequences  
226 of 13 endophytic bacteria isolated from shrub willow (*Salix*) grown in Geneva, New York. *Genome*  
227 *Announc*. 2014;2(3):e00288-14.
- 228 13. Bolger AM, Lohse M, Usadel B. Trimmomatic: a flexible trimmer for Illumina sequence data.  
229 *Bioinformatics*. 2014;30(15):2114-20.
- 230 14. Wick RR, Judd LM, Gorrie CL, Holt KE. Unicycler: resolving bacterial genome assemblies from  
231 short and long sequencing reads. *PLoS computational biology*. 2017;13(6):e1005595.
- 232 15. Richter M, Rosselló-Móra R, Oliver Glöckner F, Peplies J. JSpeciesWS: a web server for  
233 prokaryotic species circumscription based on pairwise genome comparison. *Bioinformatics*.  
234 2015;32(6):929-31.

- 235 16. Seemann T. Prokka: rapid prokaryotic genome annotation. *Bioinformatics*. 2014;30(14):2068-9.
- 236 17. Kleinheinz KA, Joensen KG, Larsen MV. Applying the ResFinder and VirulenceFinder web-services  
237 for easy identification of acquired antibiotic resistance and E. coli virulence genes in bacteriophage and  
238 prophage nucleotide sequences. *Bacteriophage*. 2014;4(2):e27943.
- 239 18. Price MN, Dehal PS, Arkin AP. FastTree 2—approximately maximum-likelihood trees for large  
240 alignments. *PloS one*. 2010;5(3):e9490.
- 241 19. Lowe N, Gan HM, Chakravartty V, Scott R, Szegedi E, Burr TJ, et al. Quorum-sensing signal  
242 production by *Agrobacterium vitis* strains and their tumor-inducing and tartrate-catabolic plasmids.  
243 *FEMS microbiology letters*. 2009;296(1):102-9.
- 244 20. Johnson LS, Eddy SR, Portugaly E. Hidden Markov model speed heuristic and iterative HMM  
245 search procedure. *BMC bioinformatics*. 2010;11(1):431.
- 246 21. Gan HM, Gan HY, Ahmad NH, Aziz NA, Hudson AO, Savka MA. Whole genome sequencing and  
247 analysis reveal insights into the genetic structure, diversity and evolutionary relatedness of luxI and luxR  
248 homologs in bacteria belonging to the Sphingomonadaceae family. *Frontiers in cellular and infection*  
249 *microbiology*. 2015;4:188.
- 250 22. Sullivan MJ, Petty NK, Beatson SA. Easyfig: a genome comparison visualizer. *Bioinformatics*.  
251 2011;27(7):1009-10.
- 252 23. Périchon B, Goussard S, Walewski V, Krizova L, Cerqueira G, Murphy C, et al. Identification of 50  
253 Class D  $\beta$ -Lactamases and 65 *Acinetobacter*-Derived Cephalosporinases in *Acinetobacter* spp.  
254 *Antimicrobial Agents and Chemotherapy*. 2014;58(2):936-49.
- 255 24. Lopes B, Amyes S. Role of ISAbal and ISAbal25 in governing the expression of blaADC in  
256 clinically relevant *Acinetobacter baumannii* strains resistant to cephalosporins. *Journal of medical*  
257 *microbiology*. 2012;61(8):1103-8.
- 258 25. Yamamoto M, Nagao M, Matsumura Y, Hotta G, Matsushima A, Ito Y, et al. Regional  
259 dissemination of *Acinetobacter* species harbouring metallo-beta-lactamase genes in Japan. *Clinical*  
260 *microbiology and infection : the official publication of the European Society of Clinical Microbiology and*  
261 *Infectious Diseases*. 2013;19(8):729-36.
- 262 26. Kamolvit W, Derrington P, Paterson DL, Sidjabat HE. A case of IMP-4-, OXA-421-, OXA-96-, and  
263 CARB-2-producing *Acinetobacter pittii* sequence type 119 in Australia. *Journal of clinical microbiology*.  
264 2015;53(2):727-30.
- 265 27. Clemmer KM, Bonomo RA, Rather PN. Genetic analysis of surface motility in *Acinetobacter*  
266 *baumannii*. *Microbiology (Reading, England)*. 2011;157(Pt 9):2534-44.
- 267 28. Marx CJ. Development of a broad-host-range *sacB*-based vector for unmarked allelic exchange.  
268 *BMC research notes*. 2008;1(1):1.
- 269 29. Gan HM, Ibrahim Z, Shahir S, Yahya A. Identification of genes involved in the 4-  
270 aminobenzenesulfonate degradation pathway of *Hydrogenophaga* sp. PBC via transposon mutagenesis.  
271 *FEMS microbiology letters*. 2011;318(2):108-14.
- 272 30. Gao R, Krysciak D, Petersen K, Utpatel C, Knapp A, Schmeisser C, et al. Genome-wide RNA  
273 sequencing analysis of quorum sensing-controlled regulons in the plant-associated *Burkholderia glumae*  
274 PG1 strain. *Appl Environ Microbiol*. 2015;81(23):7993-8007.
- 275 31. Evans BA, Amyes SG. OXA  $\beta$ -lactamases. *Clinical microbiology reviews*. 2014;27(2):241-63.

276

277



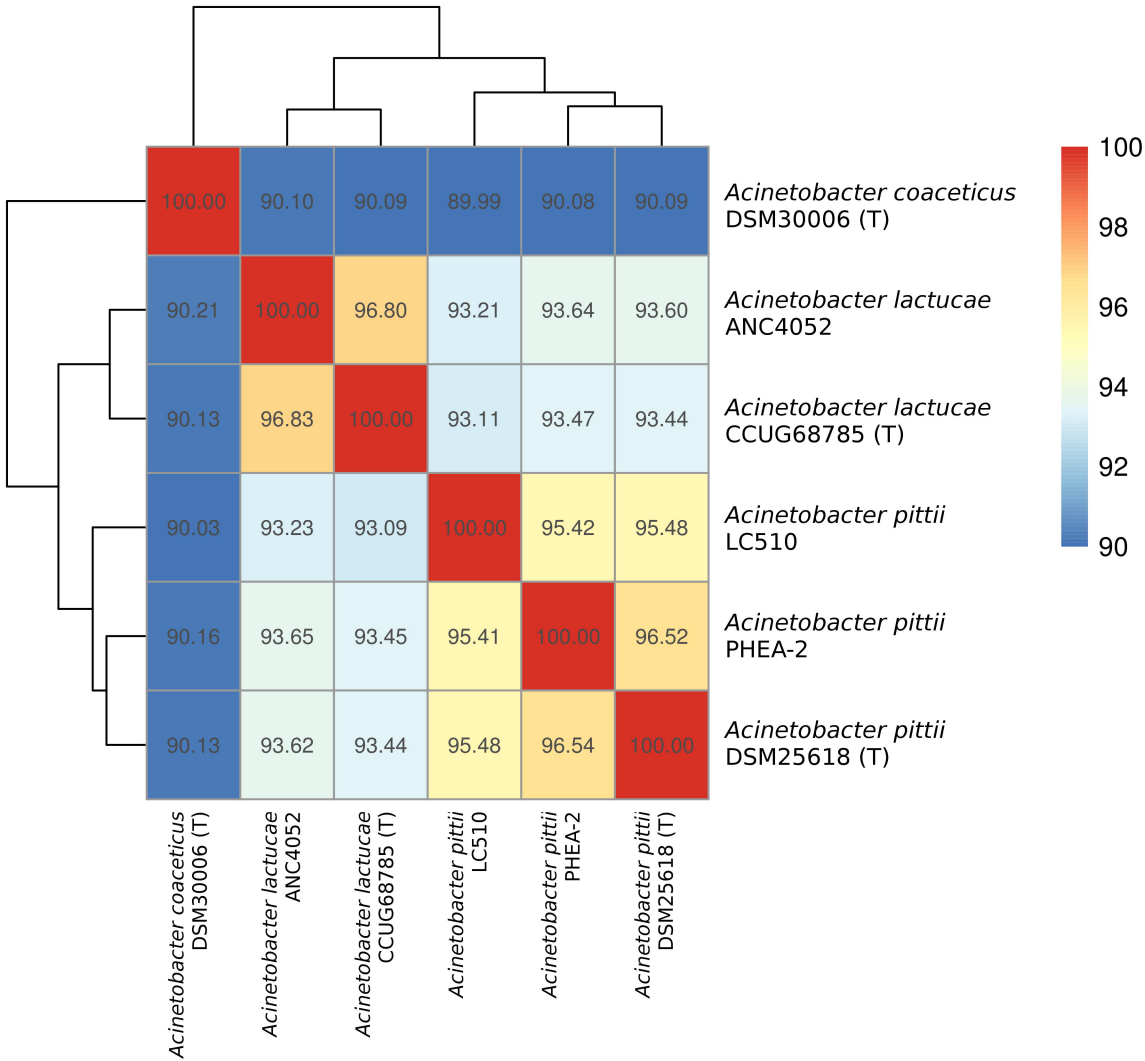

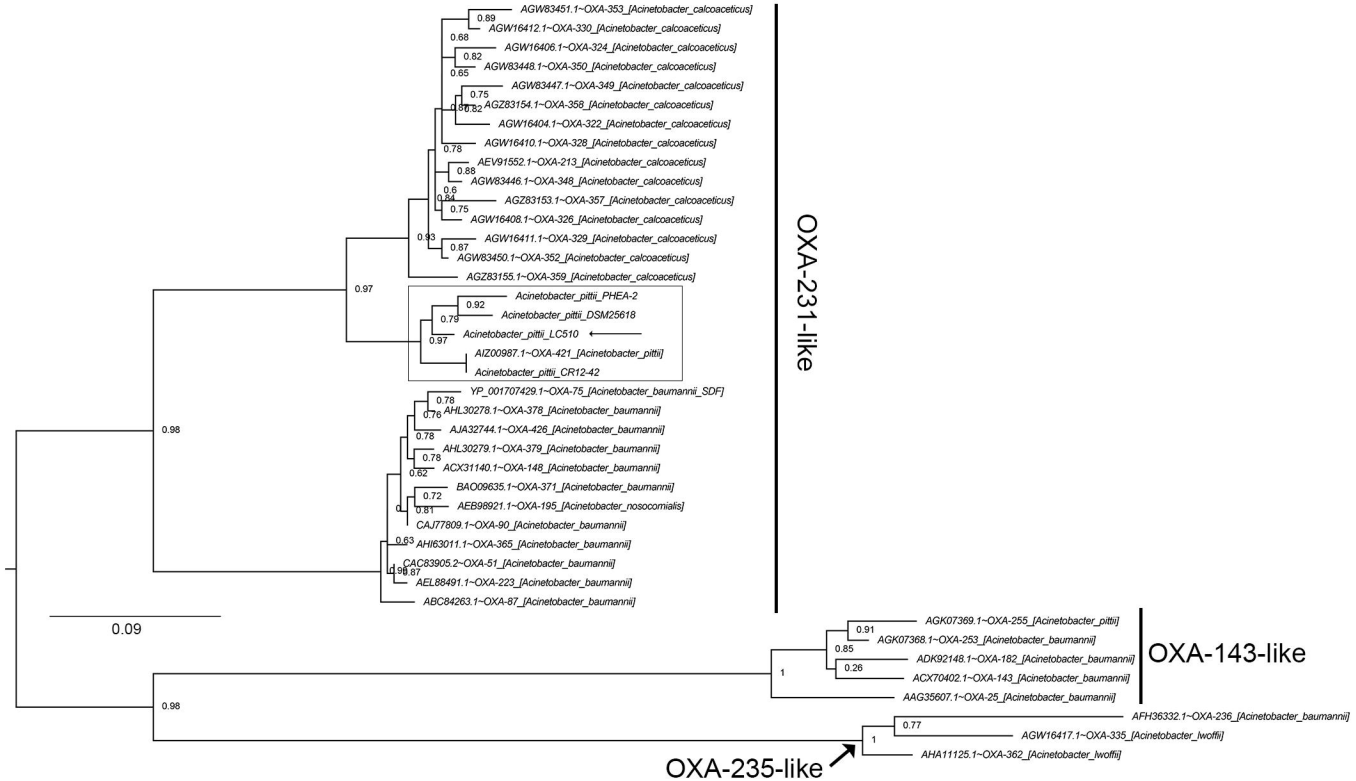

C6-oxo

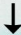

C6-OH

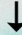

C6

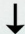

C8-oxo

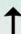

C8-OH

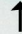

C8

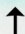

1

2

3

4

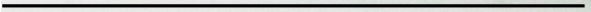

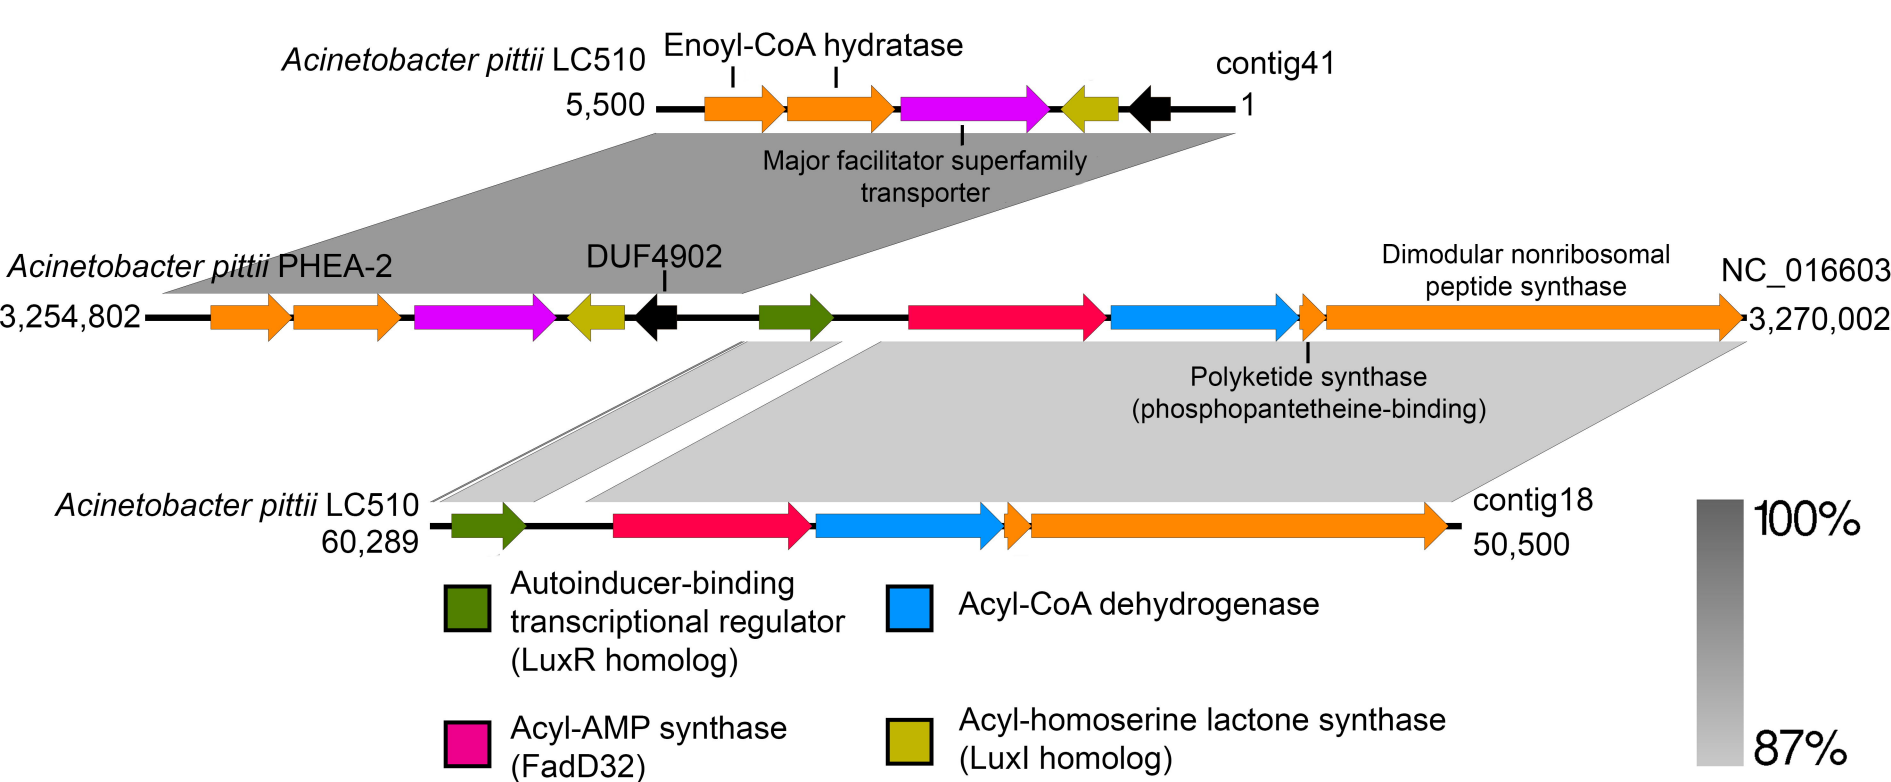

Source: https://www.biorxiv.org/content/10.1101/745182v4.full.pdf
